# Supplementary material for: Enhanced quantum yields by sterically demanding aryl-substituted β-diketonate ancillary ligands
Source: publisher site journal article supplement (doi:10.3762/bjoc.14.54), 2018-03-21
Supplement: Additional file 1 [file 1860-5397-14-54-S1.pdf]

# Supporting Information

for

## Enhanced quantum yields by sterically demanding aryl-substituted $\beta$ -diketonate ancillary ligands

Rebecca Pittkowski and Thomas Strassner\*

Address: Physical Organic Chemistry, Technische Universität Dresden, Bergstraße, 01069 Dresden, Germany.

Email: Thomas Strassner - thomas.strassner@chemie.tu-dresden.de

\*Corresponding author

### NMR spectra, additional figures, details of the solid state structure determination and computational details

|                                                          |     |
|----------------------------------------------------------|-----|
| Details of the solid-state structure determination ..... | S2  |
| Photophysical properties.....                            | S3  |
| NMR spectra.....                                         | S5  |
| Computational details.....                               | S7  |
| Frontier molecular orbital .....                         | S8  |
| XYZ-coordinates .....                                    | S9  |
| References.....                                          | S14 |

## Details of the solid-state structure determination

**Table S1:** Crystal data and crystallographic details for complex **3**

|                                                                |                                                                  |
|----------------------------------------------------------------|------------------------------------------------------------------|
| complex                                                        | <b>3</b>                                                         |
| empirical formula                                              | C <sub>33</sub> H <sub>36</sub> N <sub>2</sub> O <sub>2</sub> Pt |
| formula weight [g/mol]                                         | 687.73                                                           |
| T [K]                                                          | 100(2)                                                           |
| wavelength [Å]                                                 | 0.71073                                                          |
| crystal system                                                 | Monoclinic                                                       |
| space group                                                    | <i>P</i> 2 <sub>1</sub> /n                                       |
| <i>a</i> [Å]                                                   | 9.8385 (19)                                                      |
| <i>b</i> [Å]                                                   | 27.837 (6)                                                       |
| <i>c</i> [Å]                                                   | 11.285 (2)                                                       |
| $\alpha$ [°]                                                   | 90.0                                                             |
| $\beta$ [°]                                                    | 110.846 (7)                                                      |
| $\gamma$ [°]                                                   | 90.0                                                             |
| <i>V</i> [Å <sup>3</sup> ]                                     | 2888.4 (10)                                                      |
| <i>Z</i>                                                       | 4                                                                |
| <i>D</i> <sub>calc</sub> [Mg/m <sup>3</sup> ]                  | 1.582                                                            |
| $\mu$ (MoK $\alpha$ ) [mm <sup>-1</sup> ]                      | 4.889                                                            |
| crystal size [mm <sup>3</sup> ]                                | 0.91 × 0.87 × 0.52                                               |
| F(000)                                                         | 1368                                                             |
| reflections collected                                          | 209519                                                           |
| independent reflections                                        | 6641                                                             |
| Goodness-of-fit on F <sup>2</sup>                              | 1.163                                                            |
| <i>R</i> <sub>1</sub> [I > 2 $\sigma$ (I)]                     | 0.0271                                                           |
| <i>wR</i> <sub>2</sub> [I > 2 $\sigma$ (I)]                    | 0.0592                                                           |
| data / restraints / parameters                                 | 6641 / 0 / 352                                                   |
| $\Delta\rho_{\max}$ , $\Delta\rho_{\min}$ (e Å <sup>-3</sup> ) | 27.53, 2.33                                                      |

## Photophysical properties

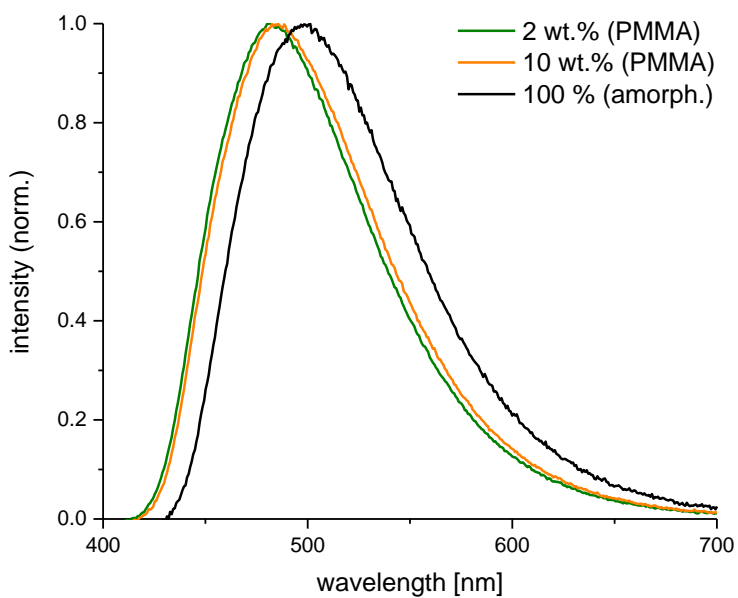

**Figure S1:** Emission profile of complex **3** measured in different concentrations ( $\lambda_{\text{exc}} = 320$  nm).

**Table S2:** Photoluminescence data of complex **2** ( $\lambda_{\text{exc}} = 320$  nm)

| Complex conc.        | CIE (x;y) <sup>a</sup> | $\lambda_{\text{em}}$ [nm] <sup>b</sup> | $\Phi$ [%] <sup>c</sup> | $\tau$ [ $\mu\text{s}$ ] <sup>d</sup> |
|----------------------|------------------------|-----------------------------------------|-------------------------|---------------------------------------|
| 2 wt.% (in PMMA)     | 0.196; 0.326           | 482                                     | 82                      | 3.1                                   |
| 10 wt.% (in PMMA)    | 0.203; 0.345           | 485                                     | 77                      | 2.4                                   |
| 100 wt.% (amorphous) | 0.238; 0.429           | 500                                     | 36                      | 3.5                                   |

<sup>[a]</sup> CIE coordinates, <sup>[b]</sup> maximum emission wavelength, <sup>[c]</sup> absolute quantum yield  $\pm 5\%$  <sup>[d]</sup> decay lifetimes (excited by laser pulses 360 nm, 20 kHz) given as  $\tau = \tau_{\text{exp}} / \Phi$ .

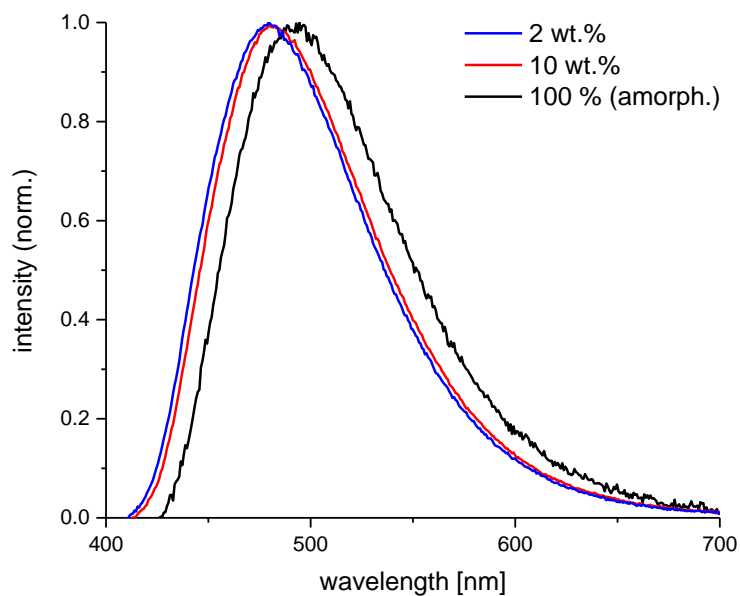

**Figure S2:** Emission profile of complex **3** measured in different concentrations ( $\lambda_{\text{exc}} = 320$  nm).

**Table S3:** Photoluminescence data of complex **3** in different concentrations ( $\lambda_{\text{exc}} = 320$  nm)

| Complex Conc.        | CIE (x;y) <sup>a</sup> | $\lambda_{\text{em}}$ [nm] <sup>b</sup> | $\Phi$ [%] <sup>c</sup> | $\tau$ [ $\mu\text{s}$ ] <sup>d</sup> |
|----------------------|------------------------|-----------------------------------------|-------------------------|---------------------------------------|
| 2 wt.% (in PMMA)     | 0.191; 0.303           | 479                                     | 73                      | 3.3                                   |
| 10 wt.% (in PMMA)    | 0.196; 0.321           | 479                                     | 72                      | 2.6                                   |
| 100 wt.% (amorphous) | 0.221; 0.384           | 494                                     | 26                      | 5.7                                   |

<sup>[a]</sup> CIE coordinates, <sup>[b]</sup> maximum emission wavelength, <sup>[c]</sup> absolute quantum yield  $\pm 5\%$  <sup>[d]</sup> decay lifetimes (excited by laser pulses 360 nm, 20 kHz) given as  $\tau = \tau_{\text{exp}} / \Phi$ .

# NMR spectra

## 2 – Pt(MPIM)(mes)

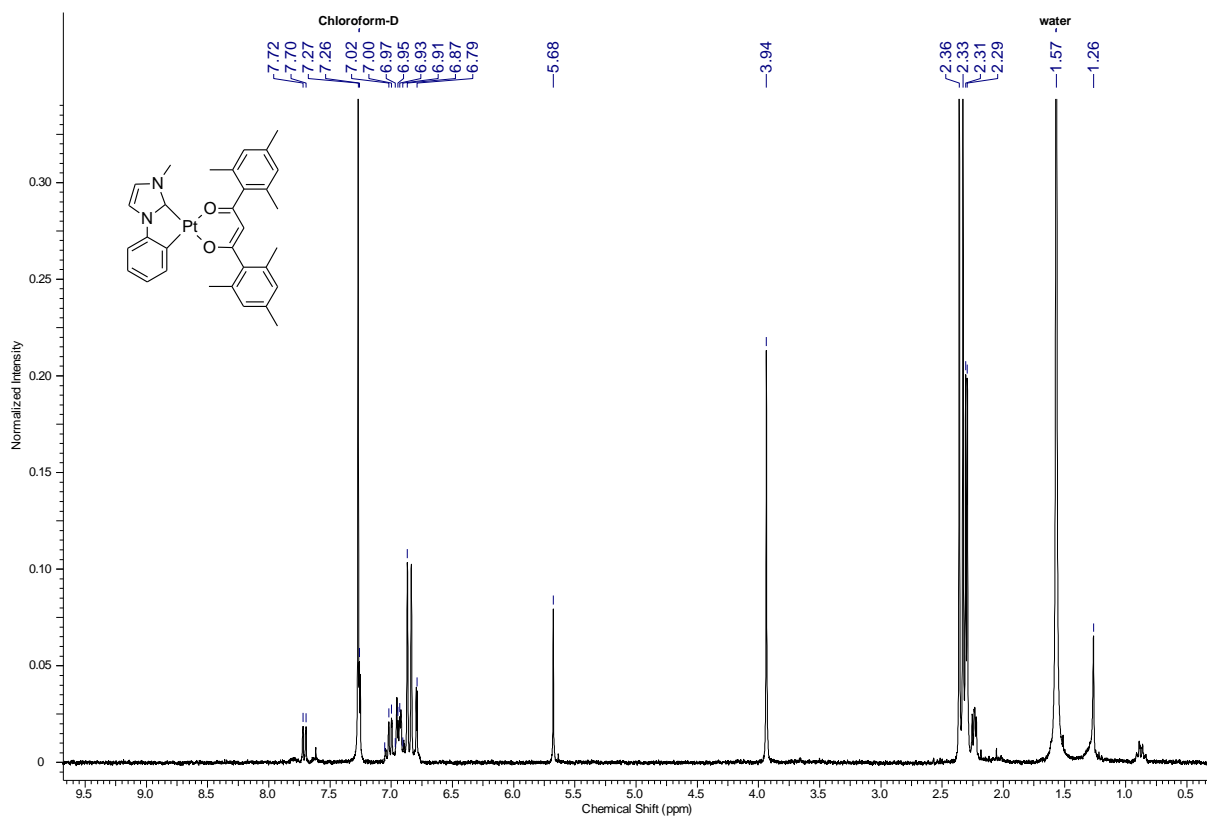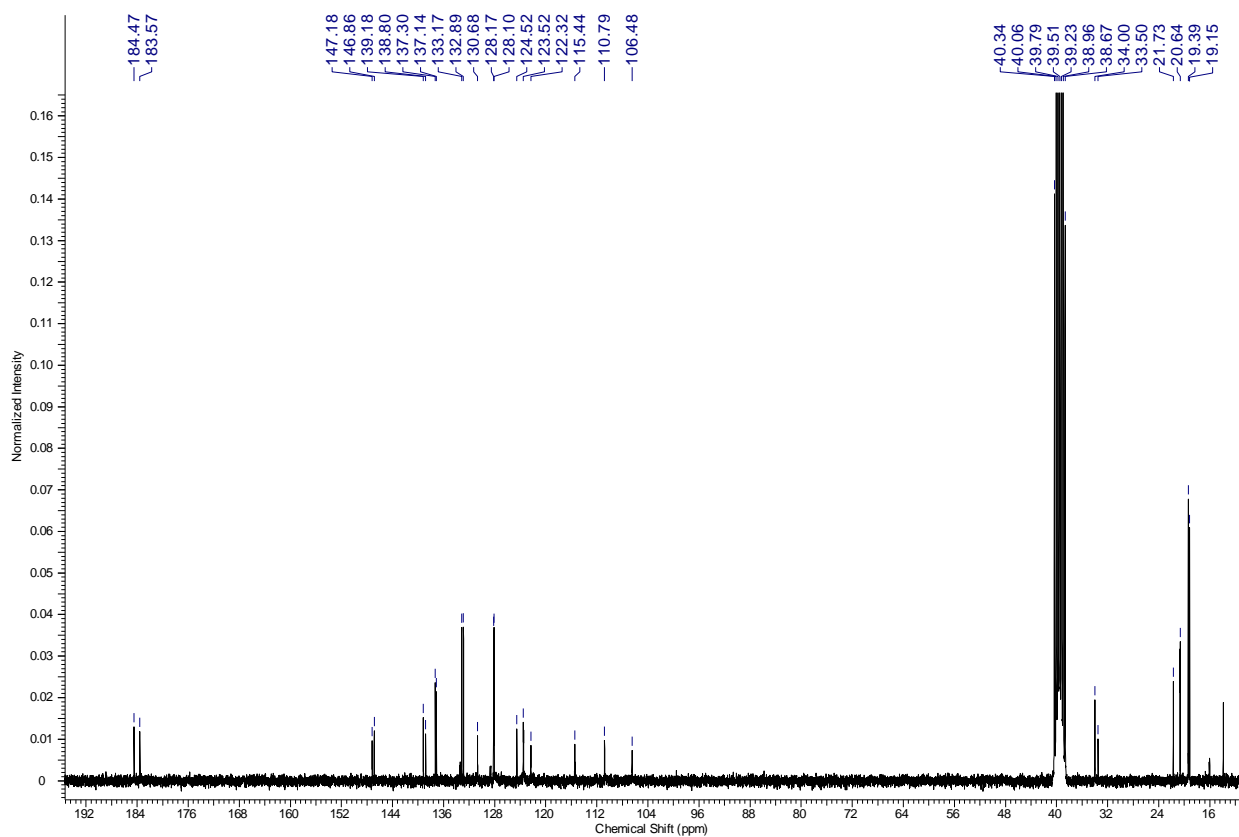

### 3 – Pt(MPIM)(dur)

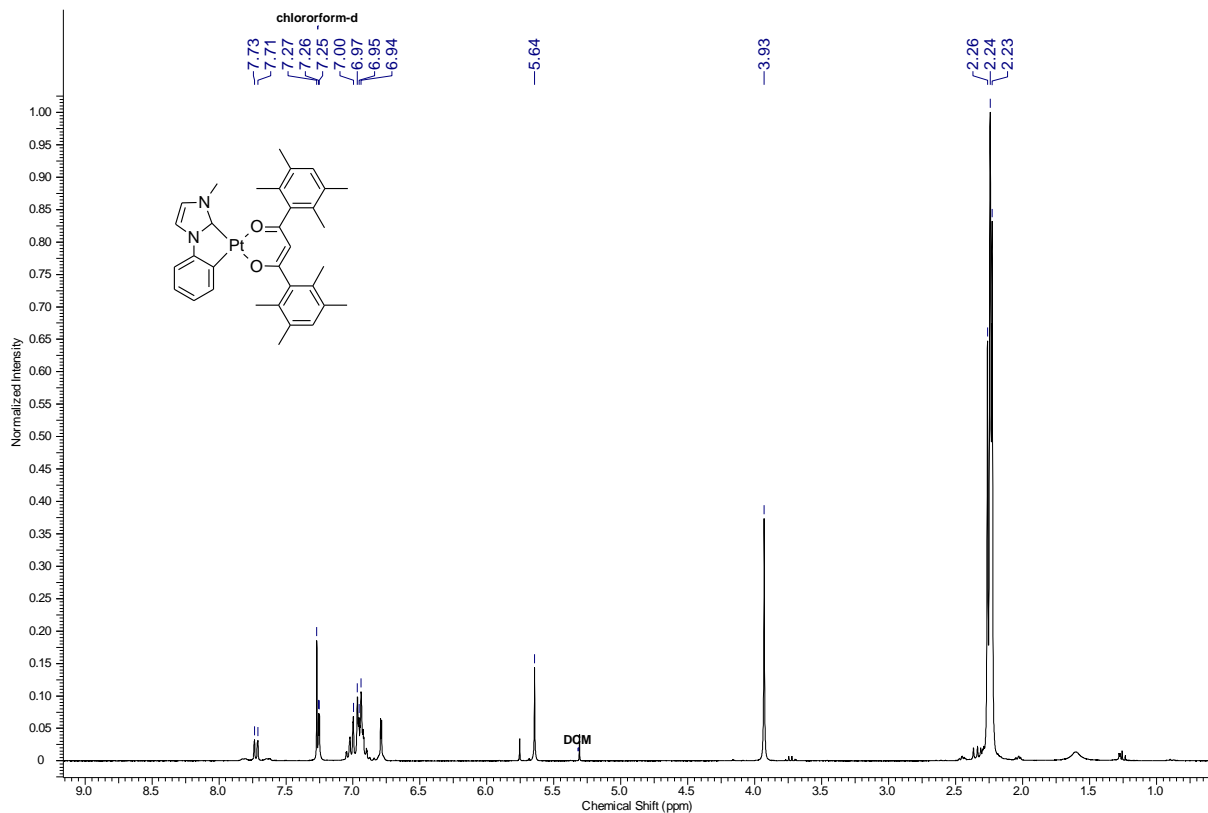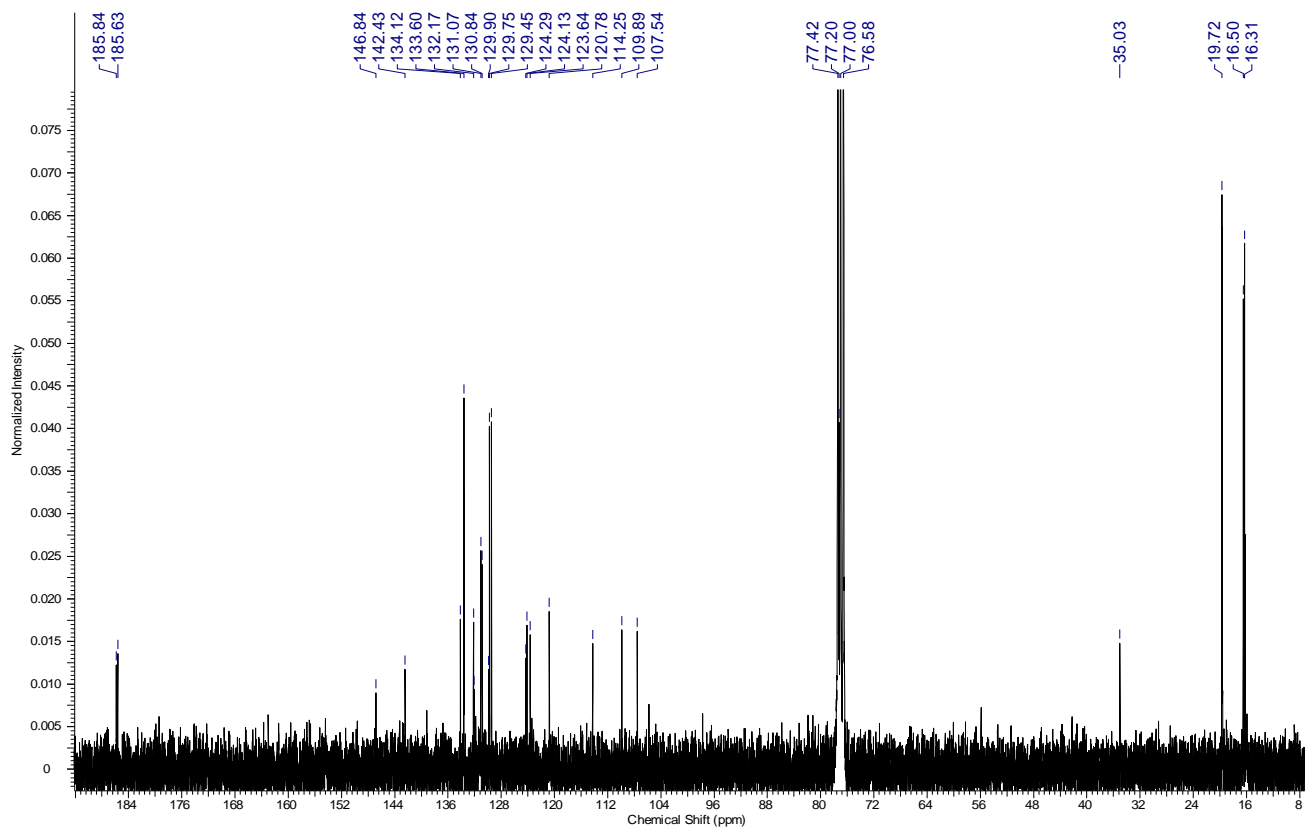

## Computational details

All calculations were performed with Gaussian 09 [1] using the B3LYP [2-6] functional with the 6-31G(d) [7-12] basis set and Hay-Wadt ECP (LANL2DZ)[13-15]. All structures were verified as true minimum geometries by the absence of negative eigenvalues in the vibrational frequency analysis. Frontier molecular orbitals (FMO) were obtained from the calculated singlet geometries. The calculation of spin densities was performed based on the obtained triplet geometries. The calculation of the theoretical emission wavelengths was performed using a previously published method [16]. GaussView [17], CYLview [18], and Avogadro [19] were used for visualization.

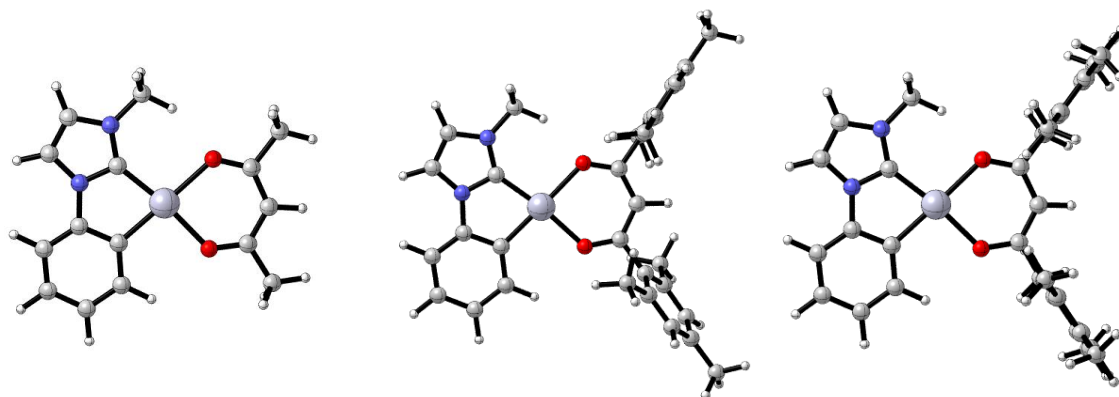

**Figure S3:** Optimized singlet geometries of Pt(MPIM)(acac) left, Pt(MPIM)(mes) middle, and Pt(MPIM)(dur) right.

**Table S4:** Comparison of calculated and experimentally obtained emission maxima for complexes **2** and **3** as well as Pt(MPIM)(acac).

| Complex                | $\lambda_{em}$ (theo) <sup>a</sup> | $\lambda_{em}$ (exp) <sup>b</sup> |
|------------------------|------------------------------------|-----------------------------------|
| Pt(MPIM)(acac) [2]     | 432                                | 441                               |
| Pt(MPIM)(mes) <b>2</b> | 458                                | 482                               |
| Pt(MPIM)(dur) <b>3</b> | 451                                | 479                               |

<sup>[a]</sup> calculated according to ref.[2] (B3LYP/6-31G(d), ECP LANL2DZ) <sup>[b]</sup> 2 wt% in PMMA, RT, N<sub>2</sub>,  $\lambda_{exc}$  = 320 nm.

LUMO + 1

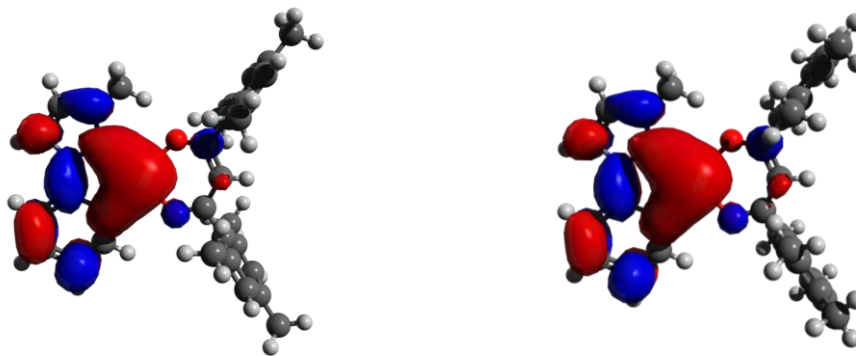

LUMO

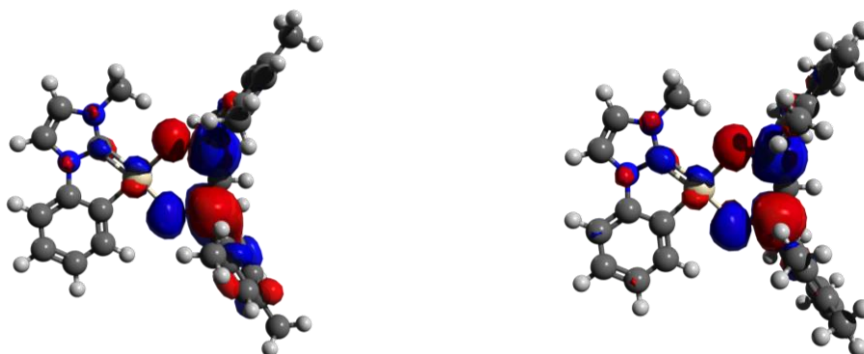

HOMO

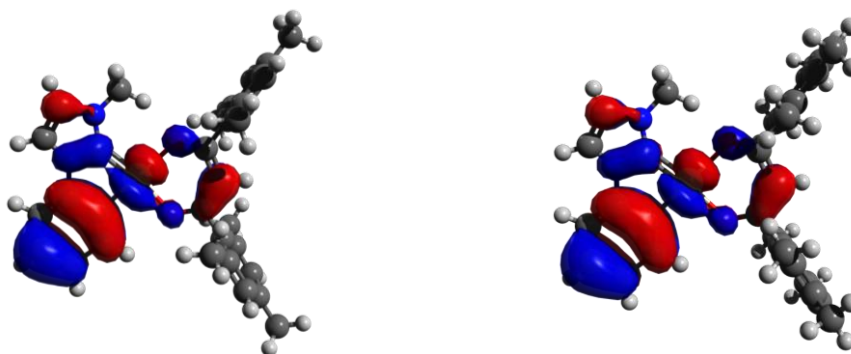

HOMO - 1

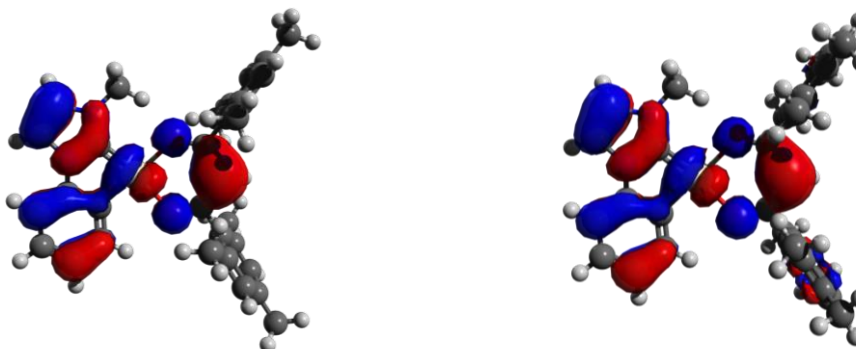

**Figure S4:** Representation of the frontier molecular orbitals (*FMOs*) of **2** (left) and **3** (right), obtained from the calculated singlet geometries (B3LYP/6-31G(d), ECP LANL2DZ, Isovalue 0.02).



## XYZ-coordinates

XYZ-coordinates for the singlet ground states of the computed compounds (B3LYP/6-31G(d), ECP LANL2DZ)

Pt(MPIM)(acac)

|    |          |          |          |
|----|----------|----------|----------|
| Pt | -0.25930 | -0.04001 | 0.00002  |
| C  | 1.39469  | -1.17210 | -0.00028 |
| C  | 1.47336  | -2.56694 | -0.00048 |
| C  | 2.61364  | -0.46501 | -0.00024 |
| C  | 2.71662  | -3.21358 | -0.00061 |
| H  | 0.55585  | -3.14744 | -0.00052 |
| C  | 3.85954  | -1.08101 | -0.00030 |
| C  | 3.90372  | -2.47898 | -0.00051 |
| H  | 2.75703  | -4.30023 | -0.00079 |
| H  | 4.77885  | -0.50062 | -0.00013 |
| H  | 4.86438  | -2.98637 | -0.00056 |
| C  | 1.11385  | 1.36377  | 0.00012  |
| C  | 3.28202  | 2.02136  | 0.00032  |
| C  | 2.50489  | 3.13699  | 0.00039  |
| H  | 4.35444  | 1.91108  | 0.00012  |
| H  | 2.77218  | 4.18224  | 0.00055  |
| O  | -2.01640 | 1.21716  | 0.00025  |
| C  | -3.21959 | 0.79024  | -0.00059 |
| O  | -1.52545 | -1.70609 | 0.00006  |
| C  | -2.80254 | -1.68749 | 0.00036  |
| N  | 1.17625  | 2.71906  | 0.00039  |
| N  | 2.41547  | 0.94413  | 0.00006  |
| C  | 0.02811  | 3.61990  | 0.00087  |
| H  | 0.05400  | 4.25287  | 0.89371  |
| H  | 0.05470  | 4.25460  | -0.89074 |
| H  | -0.88241 | 3.02035  | -0.00007 |
| C  | -4.27582 | 1.87954  | -0.00185 |
| H  | -5.29321 | 1.48060  | -0.00306 |
| H  | -4.14446 | 2.51669  | 0.88058  |
| H  | -4.14229 | 2.51660  | -0.88401 |
| C  | -3.63221 | -0.55285 | -0.00028 |
| H  | -4.70077 | -0.73345 | -0.00050 |

|   |          |          |          |
|---|----------|----------|----------|
| C | -3.43956 | -3.06305 | 0.00174  |
| H | -3.10261 | -3.61867 | 0.88437  |
| H | -4.53153 | -3.02171 | 0.00062  |
| H | -3.10076 | -3.62143 | -0.87841 |

Pt(MPIM)(mes) (2)

|    |          |          |          |
|----|----------|----------|----------|
| Pt | -1.35900 | -0.32519 | 0.03017  |
| C  | -3.10057 | 0.66714  | 0.07154  |
| C  | -3.29361 | 2.05013  | 0.11504  |
| C  | -4.25639 | -0.13884 | 0.05803  |
| C  | -4.58631 | 2.59097  | 0.14103  |
| H  | -2.42782 | 2.70527  | 0.13111  |
| C  | -5.54879 | 0.37174  | 0.08292  |
| C  | -5.70839 | 1.76071  | 0.12449  |
| H  | -4.71614 | 3.66999  | 0.17502  |
| H  | -6.41686 | -0.28261 | 0.07121  |
| H  | -6.70773 | 2.18635  | 0.14463  |
| C  | -2.61163 | -1.83847 | 0.00240  |
| C  | -4.71809 | -2.67104 | -0.01170 |
| C  | -3.85185 | -3.71848 | -0.04707 |
| H  | -5.79594 | -2.64948 | -0.00573 |
| H  | -4.03212 | -4.78175 | -0.07742 |
| O  | 0.48798  | -1.43955 | -0.00891 |
| C  | 1.65420  | -0.91572 | -0.01410 |
| O  | -0.23541 | 1.44088  | 0.04795  |
| C  | 1.04059  | 1.52497  | 0.03255  |
| N  | -3.94283 | -1.52676 | 0.01836  |
| C  | -1.34444 | -3.99904 | -0.07009 |
| H  | -1.31086 | -4.65443 | 0.80599  |
| H  | -1.33004 | -4.61107 | -0.97747 |
| H  | -0.48328 | -3.33083 | -0.06316 |
| C  | 1.95649  | 0.45679  | 0.00544  |
| H  | 3.00797  | 0.72173  | -0.01305 |
| C  | 1.58157  | 2.93145  | 0.01452  |
| C  | 2.15477  | 3.49128  | 1.17182  |
| C  | 1.46997  | 3.69089  | -1.16807 |
| C  | 2.62253  | 4.80969  | 1.12029  |
| C  | 1.96061  | 4.99939  | -1.17615 |

|   |          |          |          |
|---|----------|----------|----------|
| C | 2.54337  | 5.57790  | -0.04377 |
| C | 3.08858  | 6.98692  | -0.08643 |
| C | 2.79814  | -1.89947 | -0.04566 |
| C | 3.29548  | -2.42600 | 1.16193  |
| C | 3.32690  | -2.31838 | -1.28072 |
| C | 4.33375  | -3.36142 | 1.11124  |
| C | 4.36425  | -3.25747 | -1.28482 |
| C | 4.88604  | -3.78712 | -0.10113 |
| C | 6.02991  | -4.77485 | -0.12818 |
| H | 4.77208  | -3.58458 | -2.23955 |
| C | 2.78623  | -1.77642 | -2.58594 |
| H | 1.70461  | -1.93477 | -2.66714 |
| H | 2.95534  | -0.69633 | -2.67387 |
| H | 3.26623  | -2.26273 | -3.44081 |
| C | 2.72023  | -1.99770 | 2.49423  |
| H | 2.85338  | -0.92198 | 2.66224  |
| H | 1.64301  | -2.19333 | 2.54620  |
| H | 3.20351  | -2.52977 | 3.31944  |
| H | 4.71832  | -3.76976 | 2.04420  |
| C | 2.25420  | 2.71203  | 2.46615  |
| H | 1.29985  | 2.24272  | 2.73003  |
| H | 2.99862  | 1.90900  | 2.40227  |
| H | 2.54594  | 3.36963  | 3.29111  |
| H | 3.05506  | 5.24759  | 2.01800  |
| H | 1.88040  | 5.58380  | -2.09101 |
| C | 0.83565  | 3.11158  | -2.41350 |
| H | 1.31390  | 2.16842  | -2.70528 |
| H | -0.22531 | 2.89097  | -2.25427 |
| H | 0.92010  | 3.80688  | -3.25430 |
| H | 6.05828  | -5.33018 | -1.07183 |
| H | 5.95418  | -5.50015 | 0.68964  |
| H | 6.99782  | -4.26669 | -0.02062 |
| H | 3.11259  | 7.43783  | 0.91138  |
| H | 2.48490  | 7.63145  | -0.73508 |
| H | 4.11500  | 7.00532  | -0.47743 |

## Pt(MPIM)(dur) (3)

|    |          |          |          |
|----|----------|----------|----------|
| Pt | -1.49746 | -0.37813 | -0.00011 |
| C  | -3.25288 | 0.59023  | -0.00014 |
| C  | -3.46558 | 1.97100  | -0.00024 |
| C  | -4.39700 | -0.23241 | -0.00002 |
| C  | -4.76602 | 2.49358  | -0.00023 |
| H  | -2.60889 | 2.63823  | -0.00033 |
| C  | -5.69666 | 0.26001  | -0.00001 |
| C  | -5.87615 | 1.64717  | -0.00011 |
| H  | -4.91142 | 3.57117  | -0.00031 |
| H  | -6.55530 | -0.40679 | 0.00009  |
| H  | -6.88156 | 2.05882  | -0.00010 |
| C  | -2.72832 | -1.90960 | 0.00004  |
| C  | -4.82281 | -2.77185 | 0.00020  |
| C  | -3.94181 | -3.80753 | 0.00024  |
| H  | -5.90087 | -2.76534 | 0.00026  |
| H  | -4.10705 | -4.87368 | 0.00031  |
| O  | 0.36398  | -1.46948 | -0.00002 |
| C  | 1.52291  | -0.93138 | 0.00003  |
| O  | -0.39821 | 1.40360  | -0.00024 |
| C  | 0.87609  | 1.50069  | -0.00016 |
| N  | -2.65945 | -3.26428 | 0.00014  |
| N  | -4.06379 | -1.61638 | 0.00007  |
| C  | -1.43075 | -4.05339 | 0.00013  |
| H  | -1.39798 | -4.68666 | 0.89235  |
| H  | -1.39818 | -4.68691 | -0.89192 |
| H  | -0.57891 | -3.37331 | -0.00006 |
| C  | 1.80670  | 0.44531  | -0.00005 |
| H  | 2.85391  | 0.72541  | -0.00002 |
| C  | 1.40462  | 2.91593  | -0.00014 |
| C  | 1.63085  | 3.56219  | 1.23073  |
| C  | 1.63196  | 3.56185  | -1.23098 |
| C  | 2.10952  | 4.88623  | 1.22433  |
| C  | 2.11057  | 4.88591  | -1.22452 |
| C  | 2.34006  | 5.51650  | -0.00008 |
| H  | 2.70866  | 6.54095  | -0.00005 |
| C  | 2.68325  | -1.89948 | 0.00016  |
| C  | 3.20047  | -2.34920 | -1.23041 |
| C  | 3.20090  | -2.34844 | 1.23082  |

|   |         |          |          |
|---|---------|----------|----------|
| C | 4.27562 | -3.25866 | -1.22412 |
| C | 4.27603 | -3.25793 | 1.22470  |
| C | 4.78918 | -3.69084 | 0.00034  |
| H | 5.62108 | -4.39311 | 0.00040  |
| C | 4.87403 | -3.76658 | 2.51608  |
| H | 5.25304 | -2.94797 | 3.14179  |
| H | 4.13658 | -4.30832 | 3.12319  |
| H | 5.70749 | -4.44839 | 2.32022  |
| C | 2.63317 | -1.87465 | 2.55170  |
| H | 1.75721 | -1.23643 | 2.42321  |
| H | 2.33461 | -2.72291 | 3.18069  |
| H | 3.37786 | -1.30653 | 3.12537  |
| C | 2.63230 | -1.87615 | -2.55136 |
| H | 1.75621 | -1.23808 | -2.42294 |
| H | 3.37670 | -1.30813 | -3.12549 |
| H | 2.33377 | -2.72476 | -3.17990 |
| C | 4.87323 | -3.76804 | -2.51539 |
| H | 4.13560 | -4.31010 | -3.12199 |
| H | 5.25207 | -2.94978 | -3.14166 |
| H | 5.70674 | -4.44975 | -2.31939 |
| C | 1.36192 | 2.87341  | 2.55130  |
| H | 1.05532 | 1.83379  | 2.42328  |
| H | 2.25163 | 2.88086  | 3.19417  |
| H | 0.56593 | 3.38457  | 3.10869  |
| C | 2.37005 | 5.62769  | 2.51517  |
| H | 1.46657 | 5.70054  | 3.13470  |
| H | 3.13077 | 5.12704  | 3.12875  |
| H | 2.72073 | 6.64551  | 2.31782  |
| C | 2.37213 | 5.62707  | -2.51533 |
| H | 3.13354 | 5.12643  | -3.12806 |
| H | 1.46921 | 5.69954  | -3.13571 |
| H | 2.72240 | 6.64503  | -2.31794 |
| C | 1.36414 | 2.87272  | -2.55160 |
| H | 1.05823 | 1.83290  | -2.42354 |
| H | 0.56807 | 3.38324  | -3.10945 |
| H | 2.25416 | 2.88069  | -3.19403 |

## References SI

- [1] Frisch, M. J.; Trucks, G. W.; Schlegel, H. B.; Scuseria, G. E.; Robb, M. A.; Cheeseman, J. R.; Scalmani, G.; Barone, V.; Mennucci, B.; Petersson, G. A.; Nakatsuji, H.; Caricato, M.; Li, X.; Hratchian, H. P.; Izmaylov, A. F.; Bloino, J.; Zheng, G.; Sonnenberg, J. L.; Hada, M.; Ehara, M.; Toyota, K.; Fukuda, R.; Hasegawa, J.; Ishida, M.; Nakajima, T.; Honda, Y.; Kitao, O.; Nakai, H.; Vreven, T.; Montgomery Jr., J. A.; Peralta, J. E.; Ogliaro, F.; Bearpark, M.; Heyd, J. J.; Brothers, E.; Kudin, K. N.; Staroverov, V. N.; Kobayashi, R.; Normand, J.; Raghavachari, K.; Rendell, A.; Burant, J. C.; Iyengar, S. S.; Tomasi, J.; Cossi, M.; Rega, N.; Millam, J. M.; Klene, M.; Knox, J. E.; Cross, J. B.; Bakken, V.; Adamo, C.; Jaramillo, J.; Gomperts, R.; Stratmann, R. E.; Yazyev, O.; Austin, A. J.; Cammi, R.; Pomelli, C.; Ochterski, J. W.; Martin, R. L.; Morokuma, K.; Zakrzewski, V. G.; Voth, G. A.; Salvador, P.; Dannenberg, J. J.; Dapprich, S.; Daniels, A. D.; Farkas, Ö.; Foresman, J. B.; Ortiz, J. V.; Cioslowski, J.; Fox, D. J. *Gaussian 09*, Revision D.01; Gaussian Inc.: Wallingford CT, 2009.
- [2] Vosko, S. H.; Wilk, L.; Nusair, M. *Can. J. Phys.* 1980, 58, 1200–1211.
- [3] Becke, A. D. *J. Chem. Phys.* 1993, 98, 5648-5652.
- [4] Miehlich, B.; Savin, A.; Stoll, H.; Preuss, H. *Chem. Phys. Lett.* 1989, 157, 200–206.
- [5] Lee, C.; Yang, W.; Parr, R. G. *Phys. Rev. B* 1988, 37, 785–789.
- [6] Stephens, P. J.; Devlin, F. J.; Chabalowski, C. F.; Frisch, M. J. *J. Phys. Chem.* 1994, 98, 11623–11627.
- [7] Ditchfield, R.; Hehre, W. J.; Pople, J. A. *J. Chem. Phys.* 1971, 54, 724–728.
- [8] Hehre, W. J.; Ditchfield, R.; Pople, J. A. *J. Chem. Phys.* 1972, 56, 2257–2261.
- [9] Hariharan, P. C.; Pople, J. A. *Chem. Phys. Lett.* 1972, 16, 217–219.
- [10] Hariharan, P. C.; Pople, J. A. *Theor. Chim. Acta* 1973, 28, 213–222.
- [11] Hariharan, P. C.; Pople, J. A. *Mol. Phys.* 1974, 27, 209–214.
- [12] Rassolov, V. A.; Pople, J. A.; Ratner, M. A.; Windus, T. L. *J. Chem. Phys.* 1998, 109, 1223–1229.
- [13] Hay, P. J.; Wadt, W. R. *J. Chem. Phys.* 1985, 82, 270–283.
- [14] Wadt, W. R.; Hay, P. J. *J. Chem. Phys.* 1985, 82, 284–298.
- [15] Hay, P. J.; Wadt, W. R. *J. Chem. Phys.* 1985, 82, 299–310.
- [16] Unger, Y.; Strassner, T.; Lennartz, C. *J. Organomet. Chem.* 2013, 748, 63–67.
- [17] Dennington, R.; Keith, T. A.; Millam, J. M. *Gaussview*; Semichem Inc.: Shawnee Mission, KS, 2009.
- [18] Legault, C. Y. *CYLview*, 1.0b; Université de Sherbrooke, 2009.
- [19] Hanwell, M. D.; Curtis, D. E.; Lonie, D. C.; Vandermeersch, T.; Zurek, E.; Hutchison, G. R. *J. Cheminform.* 2012, 4, 1–17.
